# Supplementary material
Source: publisher figshare collection journal article supplement (https://brill.figshare.com/articles/dataset/_/9374792)
Supplement: Supplementary file 2 [file 1]

**Reproductive cycle and sperm storage of female coral snakes,  
*Micrurus corallinus* and *Micrurus frontalis***

Erick Augusto Bassi<sup>1,2,\*</sup>, Rafaela Zani Coeti<sup>1,3</sup>, Selma Maria de Almeida-Santos<sup>1,2,3</sup>

1 - Laboratório de Ecologia e Evolução, Instituto Butantan, Avenida Vital Brasil, 1500, CEP 05503-900, São Paulo, Brasil

2 - Universidade Estadual Paulista (UNESP), Instituto de Biociências, Letras e Ciências Exatas (IBILCE), Departamento de Biologia, Campus São José do Rio Preto, 2265, Rua Cristóvão Colombo, 15054-000, SP, Brasil

3- Faculdade de Medicina Veterinária e Zootecnia, Universidade de São Paulo, Departamento de Cirurgia, Av. Orlando Marques de Paiva, Cidade Universitária, 8705508-000, São Paulo, SP, Brasil

\*Corresponding author; e-mail: masterbassi@hotmail.com

**Supplementary material**

**Table S1A.** List of *Micrurus corallinus* and *Micrurus frontalis* specimens from biological collections with collection sites.

| <b>Biological Collection</b> | <b>Specimen Number</b> | <b>State</b>   | <b>City</b>          |
|------------------------------|------------------------|----------------|----------------------|
| ZUEC                         | 1338                   | São Paulo      | Ubatuba              |
| ZUEC                         | 1076                   | São Paulo      | Ubatuba              |
| ZUEC                         | 1077                   | São Paulo      | Ubatuba              |
| ZUEC                         | 1078                   | São Paulo      | Ubatuba              |
| ZUEC                         | 2642                   | São Paulo      | Ubatuba              |
| ZUEC                         | 566                    | São Paulo      | Gália                |
| ZUEC                         | 75                     | São Paulo      | Itapecerica da Serra |
| MNRJ                         | 4845                   | Espírito Santo | Carapebus            |
| MNRJ                         | 7052                   | Rio de Janeiro | Itacuruça            |
| MNRJ                         | 4295                   | Rio de Janeiro | Jardim Botânico      |
| MNRJ                         | 6329                   | Rio de Janeiro | Rio bonito           |
| MNRJ                         | 7357                   | Rio de Janeiro | Jaceruba             |
| MNRJ                         | 6450                   | Rio de Janeiro | Nova iguaçu          |
| MNRJ                         | 4293                   | Rio de Janeiro | Tiuca                |
| MNRJ                         | 8244                   | Rio de Janeiro | Jardim Botânico      |
| MNRJ                         | 8246                   | Rio de Janeiro | Praia grande         |
| MNRJ                         | 2840                   | Rio de Janeiro | Caxias               |
| MNRJ                         | 23832                  | Espírito Santo | São Mateus           |
| MNRJ                         | 19319                  | Espírito Santo | Presidente Kennedy   |
| MNRJ                         | 18113                  | Rio de Janeiro | Magé                 |
| MNRJ                         | 20714                  | Rio de Janeiro | Rio de Janeiro       |
| MNRJ                         | 22034                  | São Paulo      | Itanhaém             |
| MNRJ                         | 15948                  | Rio de Janeiro | Duque de Caxias      |
| MNRJ                         | 15947                  | Rio de Janeiro | Rio de Janeiro       |
| MNRJ                         | 4292                   | Rio de Janeiro | Jardim Botânico      |
| MHNCI                        | 5801                   | Paraná         | Guaratuba            |
| MHNCI                        | 8178                   | Paraná         | Guaraqueçaba         |
| MHNCI                        | 11983                  | Paraná         | Piraquara            |
| MHNCI                        | 11533                  | Paraná         | Morretes             |
| MHNCI                        | 10513                  | Paraná         | Doutor Ulysses       |
| MHNCI                        | 5990                   | Paraná         | Cianorte             |
| MCT-PUC RS                   | 4896                   | Santa Catarina | Enseada              |
| MCT-PUC RS                   | 16305                  | Santa Catarina | Joinville            |
| MCT-PUC RS                   | 16308                  | Santa Catarina | Joinville            |
| MCT-PUC RS                   | 7347                   | Santa Catarina | Blumenau             |
| MCT-PUC RS                   | 16304                  | Santa Catarina | Joinville            |
| MCT-PUC RS                   | 2617                   | Santa Catarina | Porto belo           |
| MCT-PUC RS                   | 16303                  | Santa Catarina | São Francisco do Sul |
| MCT-PUC RS                   | 16307                  | Santa Catarina | Joinville            |
| MCT-PUC RS                   | 3145                   | São Paulo      | Iguape               |
| MCT-PUC RS                   | 16334                  | Santa Catarina | Joinville            |
| MCT-PUC RS                   | 16315                  | Santa Catarina | Joinville            |

|            |       |                |                  |
|------------|-------|----------------|------------------|
| MCT-PUC RS | 16316 | Santa Catarina | Joinville        |
| MCT-PUC RS | 16318 | Santa Catarina | Corupa           |
| MCT-PUC RS | 16321 | Santa Catarina | Joinville        |
| UFMG       | 804   | Espírito Santo | Vitória          |
| UFMG       | 384   | São Paulo      | Iporanga         |
| UFMG       | 1697  | Santa Catarina | São Bento do Sul |
| UFSC       | 362   | Santa Catarina | Benedito novo    |
| UFSC       | 491   | Santa Catarina | Florianópolis    |
| UFSC       | 976   | Santa Catarina | Florianópolis    |
| UFSC       | 1530  | Santa Catarina | Florianópolis    |

---

**Table S1B.** List of *Micrurus corallinus* and *Micrurus frontalis* specimens from biological collections with collection sites.

| <b>Biological Collection</b> | <b>Specimen Number</b> | <b>State</b>       | <b>City</b>          |
|------------------------------|------------------------|--------------------|----------------------|
| UFMG                         | 386                    | Minas Gerais       | Cascalho Rico        |
| UFMG                         | 387                    | Minas Gerais       | Lagoa Santa          |
| UFMG                         | 388                    | Minas Gerais       | Felixlândia          |
| UFMG                         | 397                    | Minas Gerais       | Santana do Riacho    |
| UFMG                         | 1635                   | Minas Gerais       | Augusto de Lima      |
| UFMG                         | 1917                   | Minas Gerais       | Brumadinho           |
| UFMG                         | 390                    | Minas Gerais       | São Joaquim de Bicas |
| UFMG                         | 399                    | Minas Gerais       | Jaboticatubas        |
| ZUEC                         | 84                     | São Paulo          | Assis                |
| ZUEC                         | 79                     | São Paulo          | Assis                |
| ZUEC                         | 86                     | São Paulo          | Assis                |
| ZUEC                         | 83                     | São Paulo          | Assis                |
| ZUEC                         | 956                    | São Paulo          | Assis                |
| ZUEC                         | 85                     | São Paulo          | Assis                |
| ZUEC                         | 80                     | São Paulo          | Assis                |
| UFG                          | 122014                 | Goiás              | PNE- mineiros        |
| IB                           | 82461                  | São Paulo          | Bragança Paulista    |
| IB                           | 83078                  | São Paulo          | Fernandópolis        |
| UFOP                         | 004S                   | Minas Gerais       | Itabirito            |
| PUC MG                       | 1653                   | Minas Gerais       | Irapé                |
| PUC MG                       | 32                     | Minas Gerais       | Carangóla            |
| PUC MG                       | 1724                   | Minas Gerais       | Irapé                |
| UFMS                         | 8                      | Mato Grosso do Sul | Campo Grande         |
| UFMS                         | 12                     | Mato Grosso do Sul | Campo Grande         |

**Table S2A.** Criteria for scores of the morphological characters of the oviduct in the qualitative analysis.

| Score | Luminal epithelium                             | Shell glands                   | Luminal secretion                | State            |
|-------|------------------------------------------------|--------------------------------|----------------------------------|------------------|
| 1     | Cuboid without cilia                           | Absent                         | Absent                           | Non-reproductive |
| 2     | Cuboid ciliated                                | Small quantity (hypotrophied)  | only one specific point (region) | Non-reproductive |
| 3     | Columnar with some region of cuboid epithelium | Hypotrophied glands            | Few areas (2-4 points)           | Reproductive     |
| 4     | Columnar without cilia                         | Hypotrophied and hypertrophied | At several points                | Reproductive     |
| 5     | Columnar with cilia throughout the extension   | Hypertrophied glands           | For almost the entire extent     | Reproductive     |

**Table S3A.** Data for specimens with sperm storage receptacles. (\*) specimens in the non-reproductive period. **V1**, primary vitellogenic follicles; **V2**, secondary vitellogenic follicle.

| Species              | Season  | Snout-vent length<br>(mm) | Ovarian<br>condition | Follicle length: right-<br>left (mm) |
|----------------------|---------|---------------------------|----------------------|--------------------------------------|
| <i>M. corallinus</i> | Spring  | 548                       | V2                   | 22.45-24.27                          |
| <i>M. corallinus</i> | Spring  | 770                       | V1                   | 9.04-7.37                            |
| <i>M. corallinus</i> | Spring  | 725                       | V1                   | 9.75-9.75                            |
| <i>M. corallinus</i> | Spring  | 690                       | V1                   | 4.35-4.30                            |
| <i>M. corallinus</i> | Summer  | 710                       | V1                   | 3.00-3.00                            |
| <i>M. corallinus</i> | Autumn* | 662                       | V1                   | 5.07-4.78                            |
| <i>M. corallinus</i> | Autumn  | 810                       | V2                   | 26.45-4.06                           |
| <i>M. corallinus</i> | Winter* | 930                       | V1                   | 7.70-8.18                            |
| <i>M. corallinus</i> | Winter* | 823                       | V1                   | 8.42-3.77                            |
| <i>M. frontalis</i>  | Spring* | 770                       | V1                   | 2.16-2.38                            |
| <i>M. frontalis</i>  | Spring* | 494                       | V1                   | 2.69-2.84                            |
| <i>M. frontalis</i>  | Summer  | 770                       | V1                   | 11.18-7.69                           |
| <i>M. frontalis</i>  | Autumn  | 825                       | V1                   | 11.74-11.10                          |
| <i>M. frontalis</i>  | Autumn  | 685                       | V1                   | 2.35-3.55                            |
