# Supplementary material
Source: publisher figshare collection journal article supplement (https://brill.figshare.com/articles/dataset/_/9374792)

Locations where specimens were collected

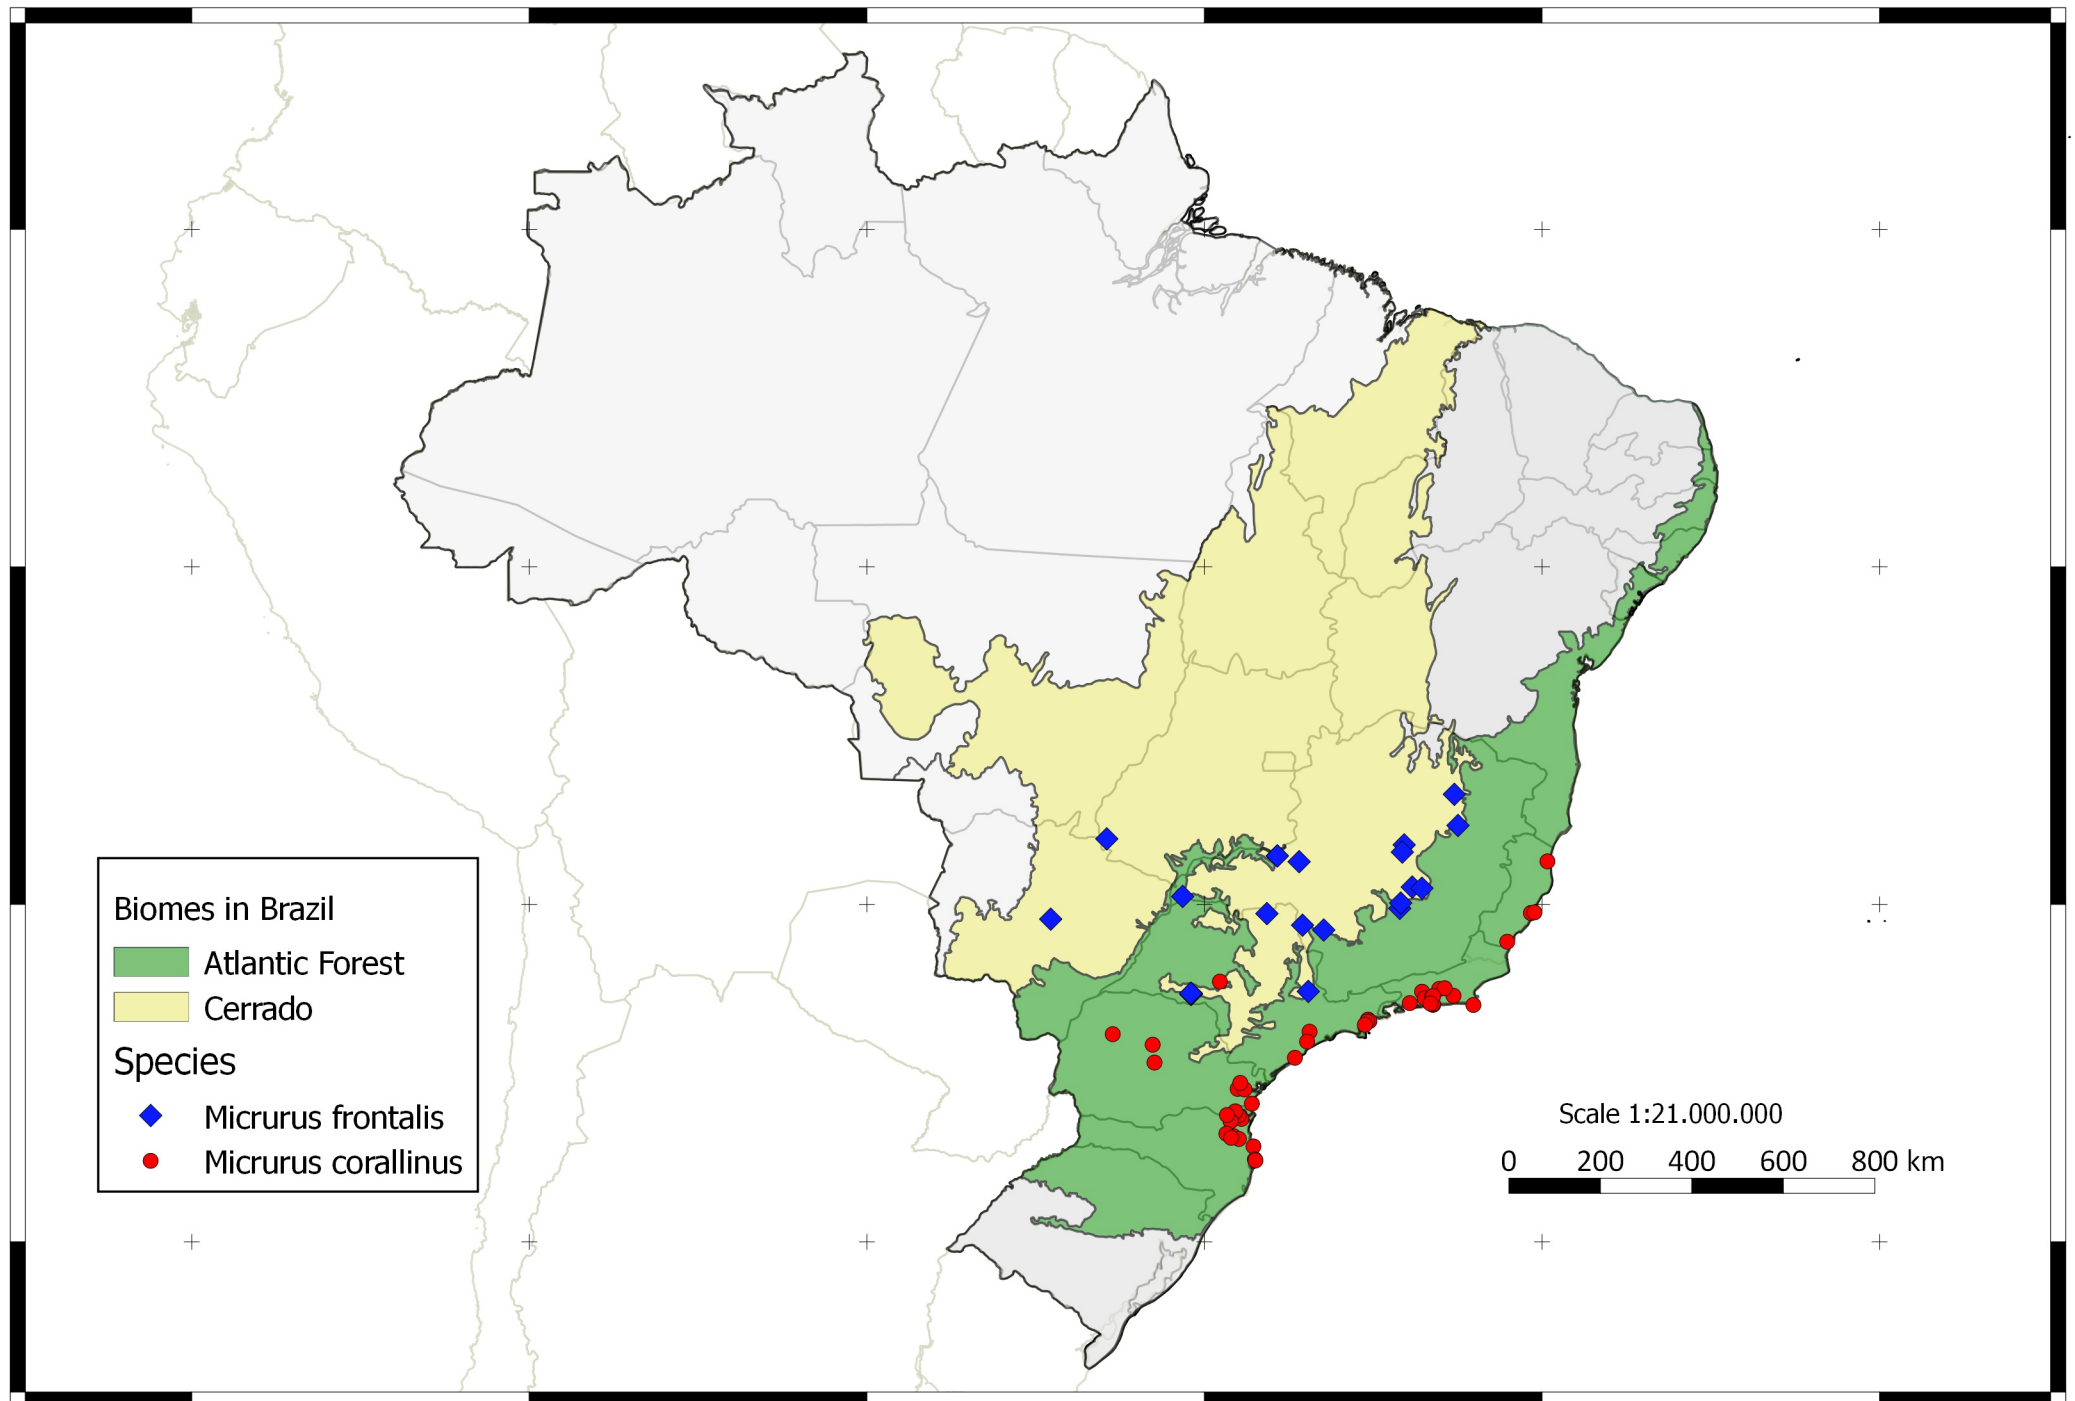

Supplement: Supplementary file 1 [file 1]
